# Supplementary material for: Tris DBA palladium is highly effective against growth and metastasis of pancreatic cancer in an orthotopic model
Source: PubMed Central journal article supplement (PMC5239497; doi:10.18632/oncotarget.10514), 2016-07-09
Supplement: oncotarget-07-51569-s001.pdf [file oncotarget-07-51569-s001.pdf]

## Tris DBA palladium is highly effective against growth and metastasis of pancreatic cancer in an orthotopic model

### Supplementary Materials

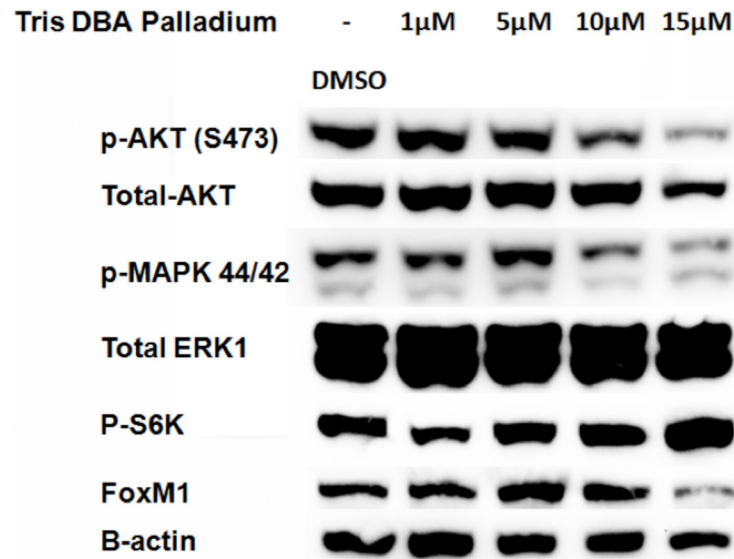

**Supplementary Figure S1: Effect of tris DBA in the activation of different signaling pathways.** Pan02 cells were treated with the indicated concentrations of tris DBA for 24 h. Cells were lysed and analyzed by western blotting using the indicated antibodies. B-actin was used as loading control.

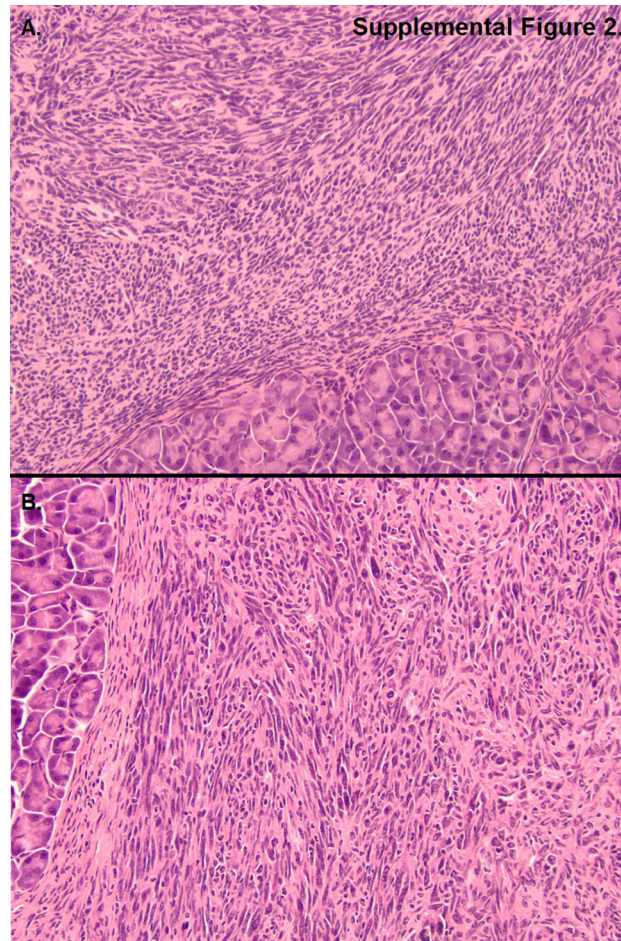

**Supplementary Figure S2: Histological hematoxylin and eosin (H&E) staining on Pan02 tumors. (A) Control group. (B) Tris DBA group.**

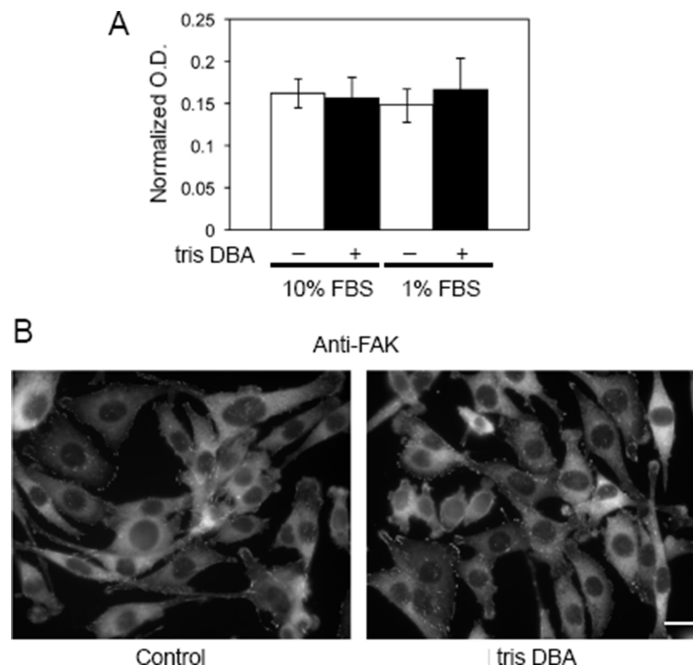

**Supplementary Figure S3: Plating efficiency or focal adhesion formation are not affected by treatment of Pan02 cells with tris DBA. (A) To assess the plating efficiency of Pan02 cells in either 1% or 10% FBS in the presence or absence of tris-DBA (1  $\mu$ M), cells were cultured for 6 h under the indicated conditions and stained with crystal violet. Cell number was quantified by measuring absorbance, and represented as average  $\pm$  S.D. of optical density (O.D.) values. (B) Cells were cultured in the presence or absence of tris DBA (1  $\mu$ M) for 20 h and stained for FAK. Representative images are shown. Bar, 5  $\mu$ m.**
